# Supplementary material for: Superhydrophobic conducting polymers with switchable water and oil repellency by voltage and ion exchange
Source: Royal Society of Chemistry journal article supplement (doi:10.1039/c3ra44960b), 2013-11-27
Supplement: c3ra44960b.pdf [file c3ra44960b.pdf]

## **Electronic Supporting Information**

### **Superhydrophobic Conducting Polymers with Switchable Water and Oil Repellency by Voltage and Ion Exchange**

**Sabri Taleb,<sup>a</sup> Thierry Darmanin,<sup>a</sup> and Frederic Guittard\*<sup>a</sup>**

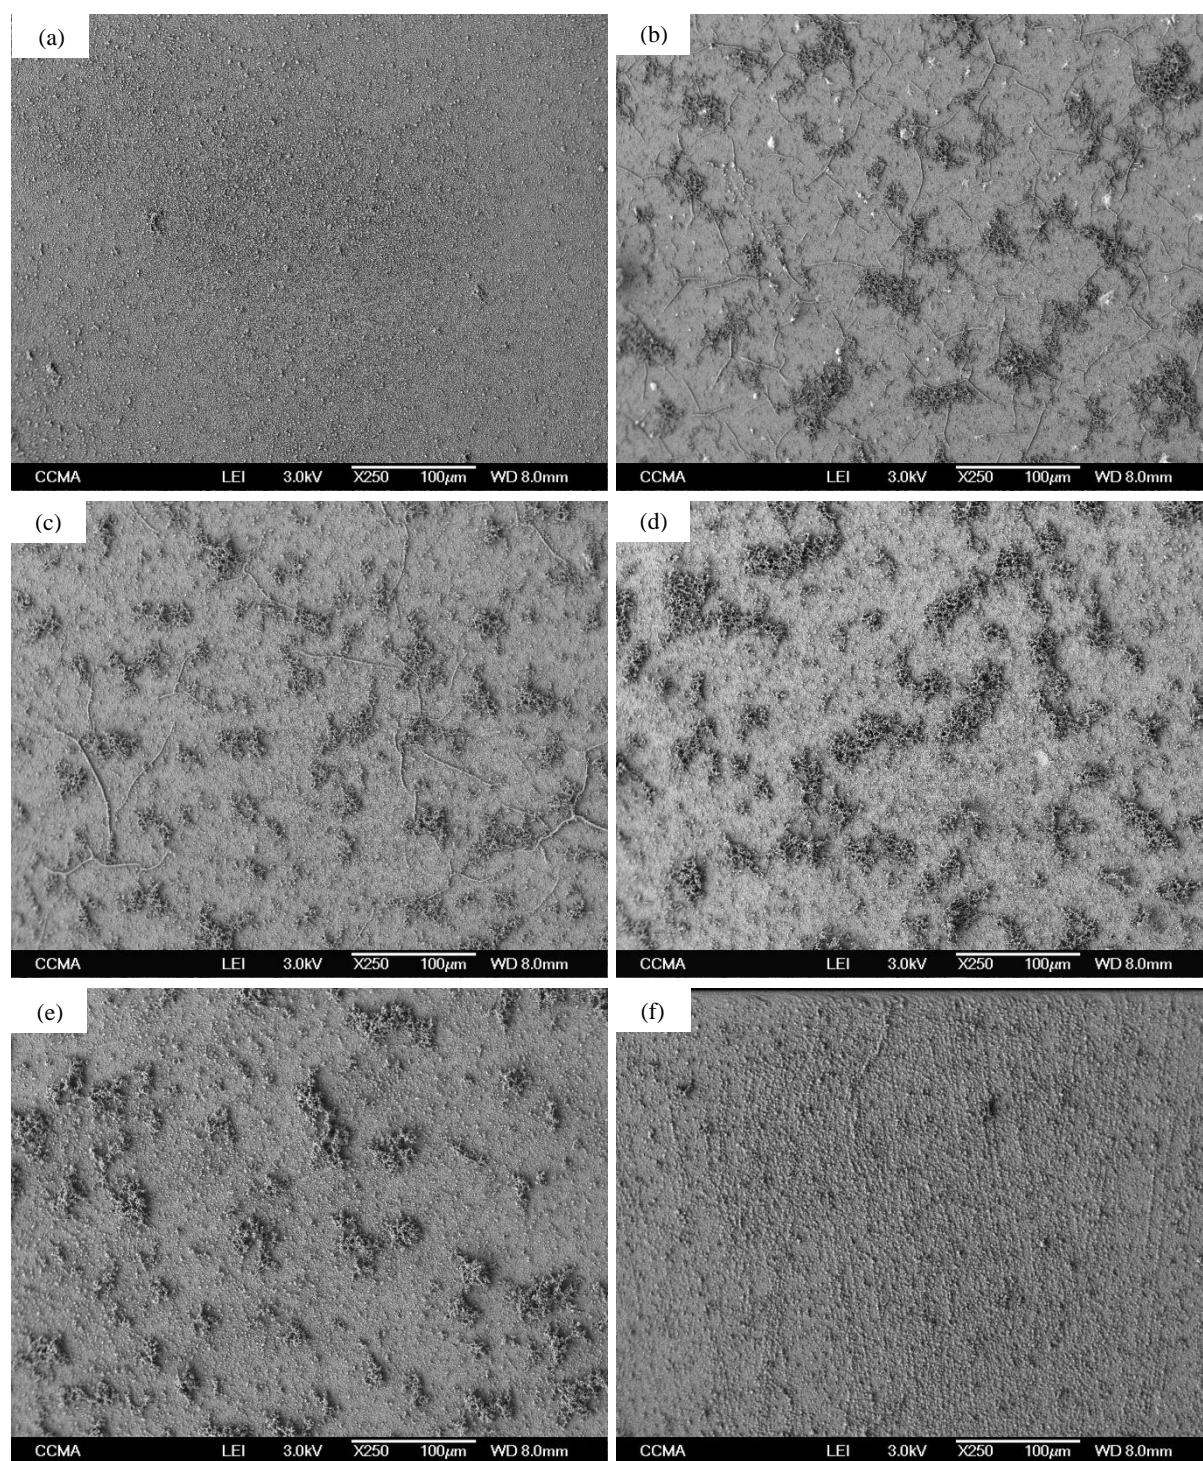

**Fig. S1** SEM images of the copolymers as a function of the mol% of EDOT-N<sup>+</sup> vs EDOT-F<sub>8</sub>: (a) 0%, (b) 25%, (c) 37.5%, (d) 50%, (e) 75% and (f) 100%; Magnification: x250.
